# Supplementary material for: Derivation of coarse-grained simulation models of chlorophyll molecules in lipid bilayers for applications in light harvesting systems
Source: Royal Society of Chemistry journal article supplement (doi:10.1039/c5cp01140j), 2015-01-01
Supplement: c5cp01140j1.pdf [file c5cp01140j1.pdf]

# Supplementary Material for: “Derivation of coarse-grained simulation models of chlorophyll molecules in lipid bilayers for applications in light harvesting systems”

Ananya Debnath<sup>† a</sup>, Sabine Wiegand<sup>‡</sup>, Harald Paulsen<sup>‡</sup>, Kurt Kremer<sup>†</sup>, Christine Peter<sup>† b</sup>

<sup>†</sup> Max Planck Institute for Polymer Research, 10 Ackermannweg, 55128 Mainz, Germany.

<sup>‡</sup> University of Mainz, Johannes-von-Müller-Weg 6, 55128 Mainz, Germany.

This supplementary material contains:

- additional information regarding the properties of the newly parameterized CG model of chl *b* and *a* in the lipid bilayer as discussed in the main text
- details regarding the probe preparation and interpretation of the FRET experiments of chl aggregation in lipid vesicles

## 1 CG parameter development

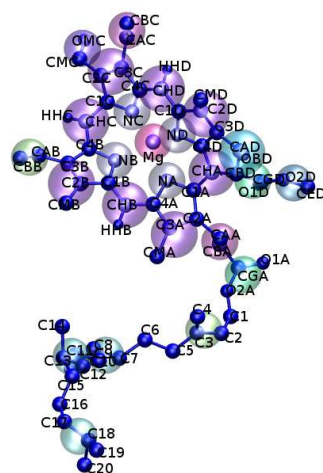

Figure S1 AA bead types for chl *b*.

present affiliation, <sup>a</sup> Department of Chemistry, Indian Institute of Technology Jodhpur, Jodhpur 342011, INDIA

<sup>b</sup> Universität Konstanz, Fachbereich Chemie, Fach 718, D-78457 Konstanz, Germany.

| Chl <i>b</i> |              |                | Chl <i>a</i> |              |                |
|--------------|--------------|----------------|--------------|--------------|----------------|
| atom         | charge group | partial charge | atom         | charge group | partial charge |
| Mg1          | 1            | 1              | Mg1          | 1            | 1.0            |
| NA           | 1            | -0.25          | NA           | 1            | -.25           |
| NB           | 1            | -0.25          | NB           | 1            | -.25           |
| NC           | 1            | -0.25          | NC           | 1            | -.25           |
| ND           | 1            | -0.25          | ND           | 1            | -.25           |
| CHA          | 2            | 0              | CHA          | 2            | 0.0            |
| C1A          | 3            | 0              | C1A          | 3            | 0.0            |
| C2A          | 3            | 0              | C2A          | 3            | 0.0            |
| C3A          | 3            | 0              | C3A          | 3            | 0.0            |
| C4A          | 3            | 0              | C4A          | 3            | 0.0            |
| CMA          | 4            | 0              | CMA          | 4            | 0.0            |
| CAA          | 5            | 0.4            | CAA          | 5            | 0.4            |
| CBA          | 5            | 0.3            | CBA          | 5            | 0.3            |
| CGA          | 5            | 0.7            | CGA          | 5            | .7             |
| O1A          | 5            | -0.7           | O1A          | 5            | -.7            |
| O2A          | 5            | -0.7           | O2A          | 5            | -.7            |
| CHB          | 6            | -0.1           | CHB          | 6            | -.1            |
| HHB          | 6            | 0.1            | HHB          | 6            | 0.1            |
| C1B          | 7            | 0              | C1B          | 7            | 0.0            |
| C2B          | 7            | 0              | C2B          | 7            | 0.0            |
| C3B          | 7            | 0              | C3B          | 7            | 0.0            |
| C4B          | 7            | 0              | C4B          | 7            | 0.0            |
| CMB          | 8            | 0              | CMB          | 8            | 0.0            |
| CAB          | 9            | 0              | CAB          | 9            | 0.0            |
| CBB          | 9            | 0              | CBB          | 9            | 0.0            |
| CHC          | 10           | -0.1           | CHC          | 10           | -.1            |
| HHC          | 10           | 0.1            | HHC          | 10           | 0.1            |
| C1C          | 11           | 0              | C1C          | 11           | 0.0            |
| C2C          | 11           | 0              | C2C          | 11           | 0.0            |
| C3C          | 11           | 0              | C3C          | 11           | 0.0            |
| C4C          | 11           | 0              | C4C          | 11           | 0.0            |
| CMC          | 12           | 0.25           | CMC          | 12           | 0.0            |
| CAC          | 13           | 0              | CAC          | 13           | 0.0            |
| CBC          | 13           | 0              | CBC          | 13           | 0.0            |
| CHD          | 14           | -0.1           | CHD          | 14           | -.1            |
| HHD          | 14           | 0.1            | HHD          | 14           | .1             |
| C1D          | 15           | 0              | C1D          | 15           | 0.0            |
| C2D          | 15           | 0              | C2D          | 15           | 0.0            |
| C3D          | 15           | 0              | C3D          | 15           | 0.0            |
| C4D          | 15           | 0              | C4D          | 15           | 0.0            |
| CMD          | 16           | 0              | CMD          | 16           | 0.0            |
| CAD          | 17           | 0.25           | CAD          | 17           | 0.25           |
| CBD          | 17           | 0              | CBD          | 17           | 0.0            |
| CGD          | 18           | 0.8            | CGD          | 18           | 0.8            |
| O1D          | 18           | -0.6           | O1D          | 18           | -0.6           |
| O2D          | 18           | -0.7           | O2D          | 18           | -0.7           |
| OMC          | 19           | -0.25          | OBD          | 19           | -0.25          |
| OBD          | 20           | -0.25          | CED          | 20           | 0.5            |
| CED          | 21           | 0.5            |              |              |                |

**Table 1** Partial charges for AA Chl *b* and Chl *a*. Remaining beads in the tails (C1 to C20) have zero partial charges.

| atom  | partial charge |
|-------|----------------|
| P5N   | 1.00000        |
| P1N_1 | -.25000        |
| P1N_2 | -.25000        |
| P1N_3 | -.25000        |
| P1N_4 | -.25000        |

**Table 2** Partial charges for CG Chl *b* and Chl *a*. Remaining beads have zero partial charges.

| AA Chl <i>b</i> beads | CG Chl <i>b</i> beads | AA Chl <i>a</i> beads | CG Chl <i>a</i> beads |
|-----------------------|-----------------------|-----------------------|-----------------------|
| Mg                    | P5N                   | Mg                    | P5N                   |
| NA                    | P1N_1                 | NA                    | P1N_1                 |
| NB                    | P1N_2                 | NB                    | P1N_2                 |
| NC                    | P1N_3                 | NC                    | P1N_3                 |
| ND                    | P1N_4                 | ND                    | P1N_4                 |
| C1A,CHA,C4D           | SC3_1                 | C1A,CHA,C4D           | SC3_1                 |
| C1D,CHD,HHD,C4C       | SC3_2                 | C1D,CHD,HHD,C4C       | SC3_2                 |
| CAC,CBC               | C2_1                  | CAC,CBC               | C2_1                  |
| C4B,CHC,C1C,HHC       | SC3_3                 | C4B,CHC,C1C,HHC       | SC3_3                 |
| CMB,C2B,C3B           | SC3_4                 | CMB,C2B,C3B           | SC3_4                 |
| CBB,CAB               | C3_2                  | CBB,CAB               | C3_2                  |
| HHB,CHB,C1B,C4A       | SC3_5                 | HHB,CHB,C1B,C4A       | SC3_5                 |
| CMA,C3A,C2A           | SC3_6                 | CMA,C3A,C2A           | SC3_6                 |
| C3D,C2D,CMD           | SC3_7                 | C3D,C2D,CMD           | SC3_7                 |
| C2C,C3C               | SC3_8                 | CMC,C2C,C3C           | SC3_8                 |
| CAD,OBD               | SC5_1                 | CAD,OBD               | SC5_1                 |
| CMC,OMC               | Na_1                  |                       |                       |
| CBD,CGD,O1D           | Na_2                  | CBD,CGD,O1D           | Na_1                  |
| O2D,CED               | Na_3                  | O2D,CED               | Na_2                  |
| CGA,O1A,O2A           | Na_4                  | CGA,O1A,O2A           | Na_3                  |
| CBA,CAA               | C2_2                  | CBA,CAA               | C2_2                  |
| C1,C2,C3,C4,C5        | C3_1                  | C1,C2,C3,C4,C5        | C3_1                  |
| C6,C7,C8,C9,C10       | C1_1                  | C6,C7,C8,C9,C10       | C1_1                  |
| C11,C12,C13,C14,C15   | C1_2                  | C11,C12,C13,C14,C15   | C1_2                  |
| C16,C17,C18,C19,C20   | C1_3                  | C16,C17,C18,C19,C20   | C1_3                  |

**Table 3** AA to CG mapping for Chl *b* and Chl *a*.

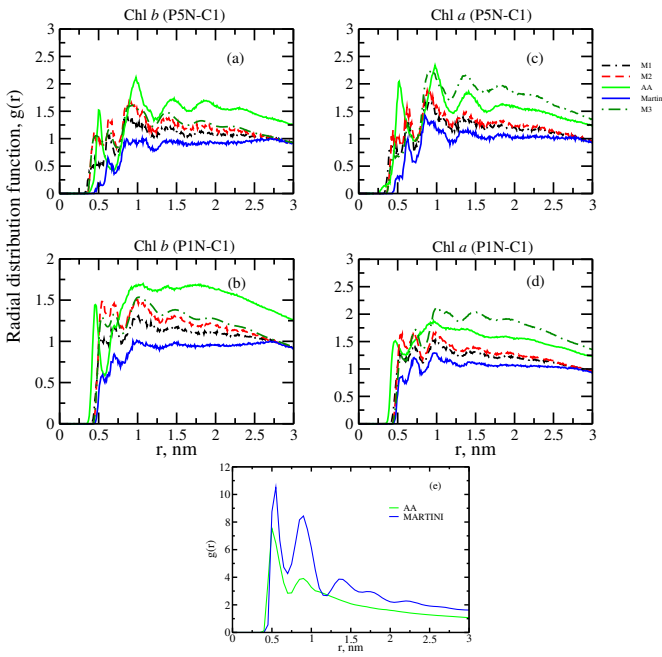

**Figure S2** (a)-(d) Comparison of radial distribution functions (RDF) between central bead, Mg (bead type, P5N)/N (bead type P1N) and the atoms in the lipid tails (bead type C1). Plot shows clearly that the first peaks from models M1 and M2 are closer to the AA one than that of Martini. (e) RDF of lipid head groups from AA and MARTINI. The peaks of RDF are not reproduced well from MARTINI except the first peak.

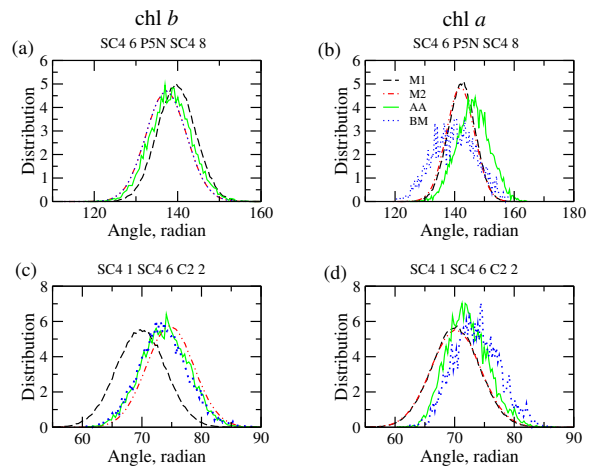

**Figure S3** Conformational behavior of chl *b* and chl *a* obtained from the different CG models, as well as in the atomistic reference simulation. Panels (a) and (b) show the distribution of the angle between the CG beads SC4\_1, SC4\_6 and C2\_2 of chl *b* and chl *a*, respectively. This angle characterizes the bending of the porphyrin ring system. Panels (c) and (d) show the distribution of the angle between the CG beads SC4\_5, SC4\_6 and SC4\_1. This angle characterizes the orientation of the aliphatic tail with respect to the ring system. Color code: black dashed line – CG model M1, red dash-dotted line – CG model M2, green – atomistic reference, blue – atomistic ensemble after backmapping. It can be seen that both CG models reproduce the conformational behavior observed in the atomistic simulations well.

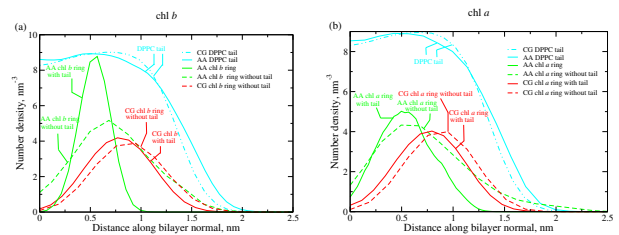

**Figure S4** Number density distributions of the beads of the ring region of chl *b*/chl *a* in the DPPC bilayer are shown with respect to the absolute value of the distance normal to the bilayer. The maximum of the density distribution is shifted towards the polar head groups of the lipid bilayer in both the AA and CG levels of resolution for the porphyrin system without aliphatic tail. Thus, the tail of chl *b*/chl *a* helps the molecule to solvate better in the apolar hydrophobic region of the lipid bilayer.

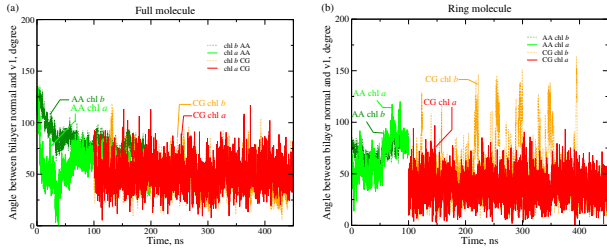

**Figure S5** The time series of the angle between the vector  $\mathbf{v1}$  and the bilayer normal (a) molecules with tail and (b) without tail. Solid line - chl  $a$ , dashed line - chl  $b$ . The angle for CG chl  $a$  ring without the tail fluctuates more than that of the ring with tail.

## 2 FRET experiments of chl in bilayers

### 2.1 Preparation of chl-containing liposomes

Chl  $b$  and  $a$ , isolated and separated as described previously<sup>1</sup> were dissolved in chloroform and added to the lipid 1,2-dipalmitoyl-sn-glycero-3-phospho-(1'-rac-glycerol (DPPG) (Avanti Polar Lipids, Alabaster, USA) at a lipid-to-chlorophyll-ratio (LCR) of 60. The solution was dried in a rotary evaporator (1 h, 30-70 mbar, RT) and the resulting lipid film hydrated in buffer (10 mM Tris/HCl (pH 7.5), 50 mM NaCl, 0.1 mM EDTA, lipid concentration  $1.25 \text{ mg ml}^{-1}$ ) under vigorous vortexing. Unilamellar liposomes of about 100 nm in size were obtained by intense ultrasonication (Vibra Cell, Sonics & Materials, Newtown, USA) and two freeze-thaw-cycles followed by extrusion of the lipid suspension (LiposoFast, Avestin, Ottawa, Canada) through a polycarbonate membrane. Dilution with buffer and various amounts of liposomes without chlorophylls, followed by the described procedure for preparing unilamellar liposomes, yielded samples with LCR values between 150 and 25,000. About 60 % of the initially added Chls were lost during the procedure; this was taken into account when estimating the final LCR.

### 2.2 Aggregation-related fluorescence quenching

The fluorescence of Chl-containing liposomes at various LCRs was measured using a Fluoromax-2 spectrometer (Jobin Yvon, Bensheim, Germany) with the excitation wavelength set to 470 nm, 2 nm and 2 nm slit widths on the excitation and emission sides, respectively, and with signal corrections for fluctuations in the lamp intensity and for the wavelength dependence of the photon counter. The extinction of all samples was kept at less than 0.1. Quenching efficiencies ( $Q$ ) in dependence on LCR were expressed as

$$Q = [F_b(LCR = 25,000) - F_b(LCR)] / F_b(LCR = 25,000),$$

where  $F_b(LCR = 25,000)$  and  $F_b(LCR)$  are the chl  $b$  fluorescence intensities at  $LCR = 25,000$  and at the given LCR, respectively. The chl  $b$  and chl  $a$  fluorescence contributions were assessed by deconvoluting the measured fluorescence spectra into chl  $b$  and chl  $a$  spectra using reference spectra measured in DPPG and integrating the chl  $b$  and chl  $a$  spectra by using the rectangle rule.

The fluorescence quenching efficiency observed needed to be corrected for the contribution to chl  $b$  quenching by energy transfer from chl  $b$  to chl  $a$  in order to yield the fraction due to aggregation. Energy transfer was calculated by relating the sensitized acceptor emission with the correspondent fluorescence quantum yields ( $\Phi_F$ ) of the pigments (determined as described below):

$$Q_{ET}(LCR) = F_a(LCR) * \Phi_F^{chlb} / \Phi_F^{chla}$$

with  $Q_{ET}(LCR)$  being the part of chl  $b$  fluorescence that is quenched due to energy transfer from chl  $b$  to chl  $a$ , and  $F_a(LCR)$  being the chl  $a$  contribution to the fluorescence, both at the given LCR.  $F_a(LCR)$  needed not to be corrected for

$F_a(LCR = 25,000)$  as direct excitation of chl *a* at the chosen excitation wavelength was negligible.

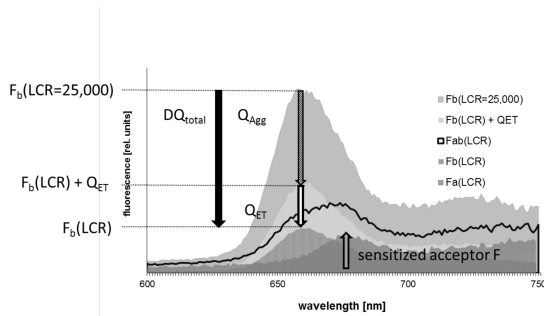

**Figure S6** Schematic overview on quenching and energy transfer events. Quenching and energy transfer events in exemplary sample (LCR) compared to sample where neither aggregation nor energy transfer from chl *b* to chl *a* are thought to take place (LCR=25,000).  $F_b(LCR=25,000)$ : chl *b* fluorescence intensities at LCR=25,000,  $F_b(LCR)$ : fluorescence at given LCR,  $F_b(LCR)$ : chl *b* fluorescence intensities at given LCR,  $F_a(LCR)$ : chl *a* fluorescence intensities at given LCR,  $DQ_{total}$ : chl *b* quenching at given LCR compared to LCR=25,000,  $Q_{Agg}$ : chl *b* quenching by pigment aggregation,  $Q_{ET}$ : chl *b* quenching by energy transfer from chl *b* to chl *a*.

In order to estimate the effect of aggregation of chl *a* on these calculations, assuming that fluorescence quenching due to aggregation affected chl *b* and chl *a* to the same extent, energy transfer efficiency was also estimated from comparing the chl *b* and chl *a* contributions. The relative contributions at LCR=25,000 were taken to reflect the situation at an energy transfer efficiency  $ET = 0$ . Then at a given  $ET = x$ , the initial chl *b* fluorescence  $F_0$  at LCR = 25,000 should be quenched to  $F_x(chlb) = (1 - x) * F_0(chlb)$ . At the same time, the sensitized acceptor emission of chl *a* at an energy transfer efficiency of  $x$  is expected to be  $x * F_0(chlb) * (qF(chla)/qF(chlb))$ . Thus, for any observed ratio of chl *b* and chl *a* fluorescence intensity, the corresponding energy transfer efficiency  $ET = x$  could be calculated. Comparison of the values obtained by the different methods showed the effect of chl *a* aggregation on the calculated energy transfer efficiency to be insignificant.

## 2.3 Fluorescence quantum yields of chl b and a in liposomes

Fluorescence quantum yields ( $\Phi_F$ ) of chl *a* and chl *b* in a lipid environment were determined in references of LCR=1,875 in 1-palmitoyl-2-oleoyl-sn-glycero-3-phospho-1'-rac-glycerol (POPG) (Avanti Polar Lipids, Alabaster, USA) by the method described in Gundlach et al.<sup>2</sup> (excitation wavelength  $\lambda_{ex} = 618$  nm, other settings and corrections as described) and using the published value for chl *a* in ethanol of 0.22 as reference<sup>3</sup>. They were 0.17 for chl *a* and 0.15 for chl *b*.

## References

- [1] P. Booth and H. Paulsen, *Biochem.*, 1996, **35**, 5103.
- [2] K. Gundlach, M. Werwie, S. Wiegand and H. Paulsen, *Biochim. Biophys. Acta, Bioenerg.*, 2009, **1787**, 1499.
- [3] G. Weber and F. W. J. Teale, *Trans. Faraday Soc.*, 1957, **53**, 646.
